# Supplementary material for: Uncovering metabolic signatures in cancer-derived exosomes: LC-MS/MS and NMR profiling
Source: Royal Society of Chemistry journal article supplement (doi:10.1039/d4nr03454f), 2024-11-20
Supplement: d4nr03454f1.pdf [file d4nr03454f1.pdf]

## Uncovering Metabolic Signatures in Cancer-Derived Exosomes: LC-MS/MS and NMR Profiling.

Nandini Bajaj<sup>1,2</sup>, Deepika Sharma<sup>1,2\*</sup>

<sup>1</sup>Institute of Nano Science and Technology, Knowledge City, Sector 81, Mohali, Punjab, 140306, India.

<sup>2</sup>Academy of Scientific and Innovative Research (AcSIR), Ghaziabad- 201002, India.

### Supplementary Figures:

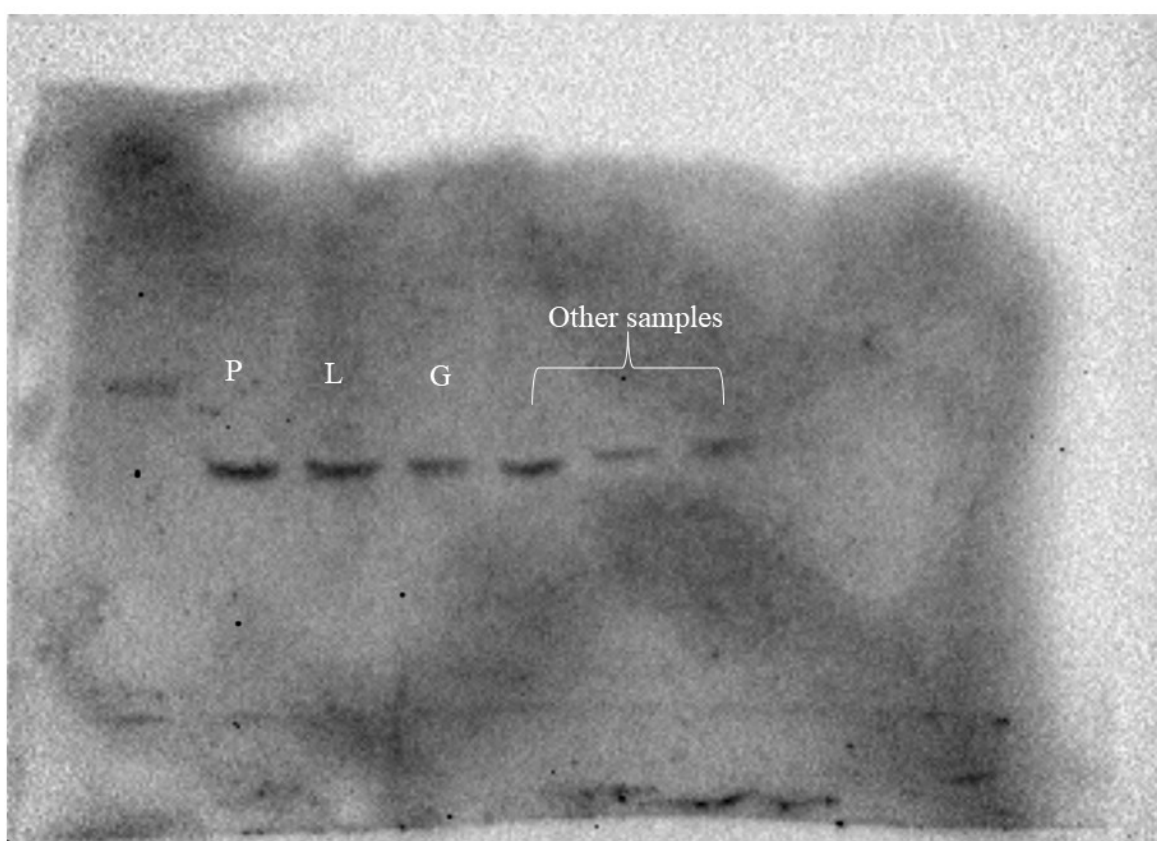

**Fig S1:** Full Western blot of common tetrapanin cell surface exosomal marker CD63 of exosomes derived Pancreatic (P), Lung (L) and Glioma (G).

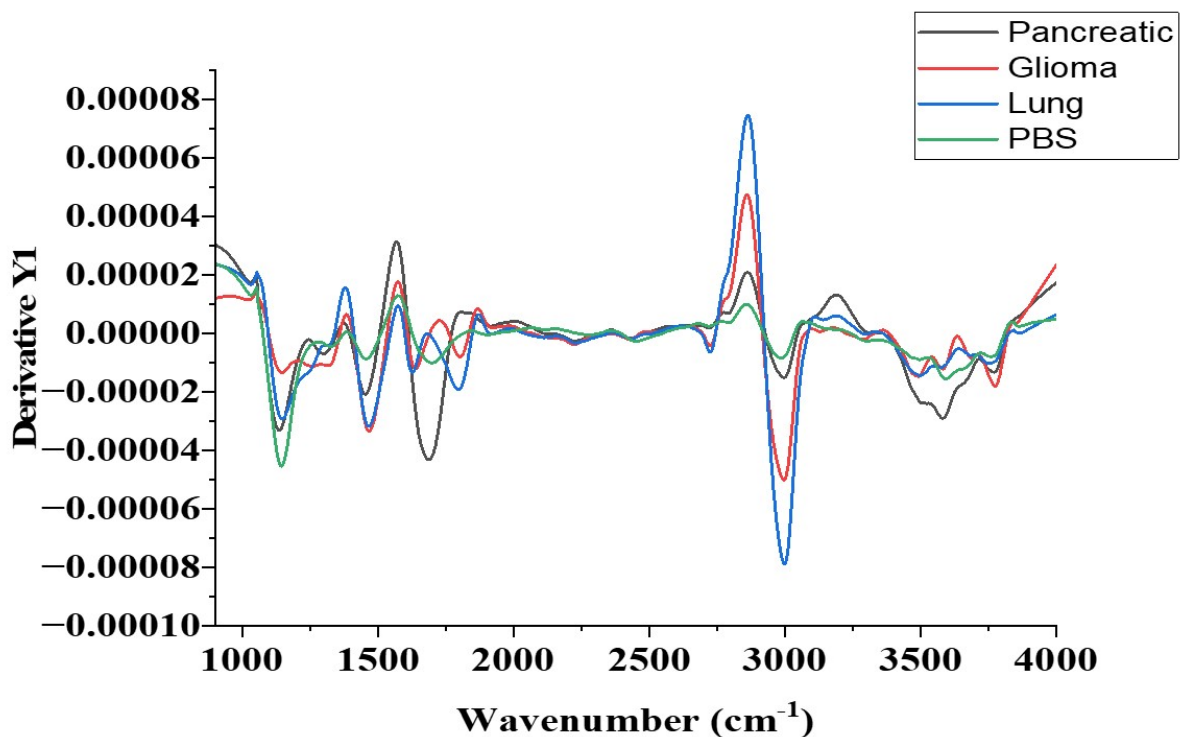

**Fig S2:** ATR-FTIR first derivative spectra of Exosomes derived from Pancreatic, Glioma and Lung cancer cells.

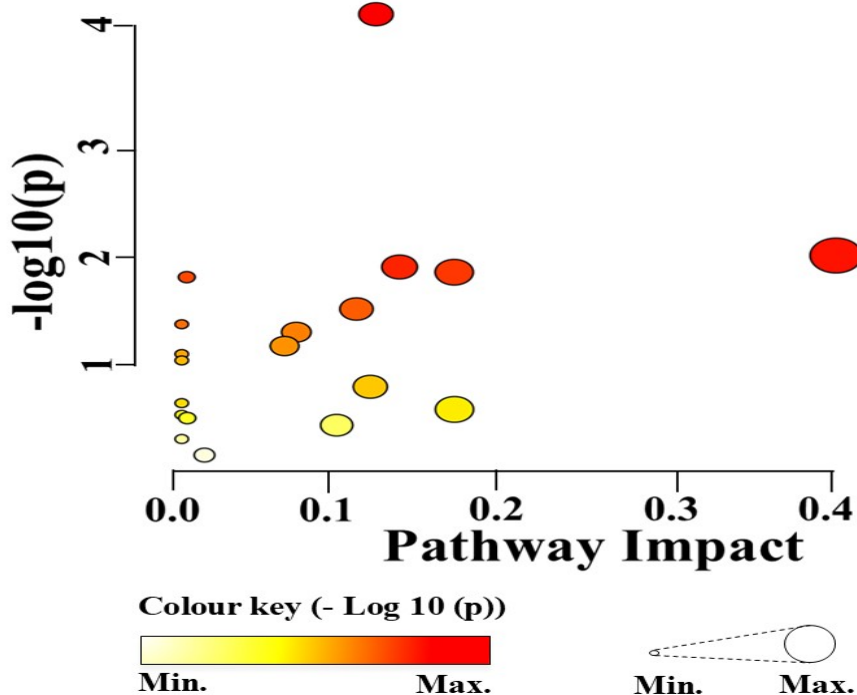

**Fig S3:** Pathway analysis of metabolites obtained from Pancreatic cancer cells via NMR using Metaboanalyst 6.0

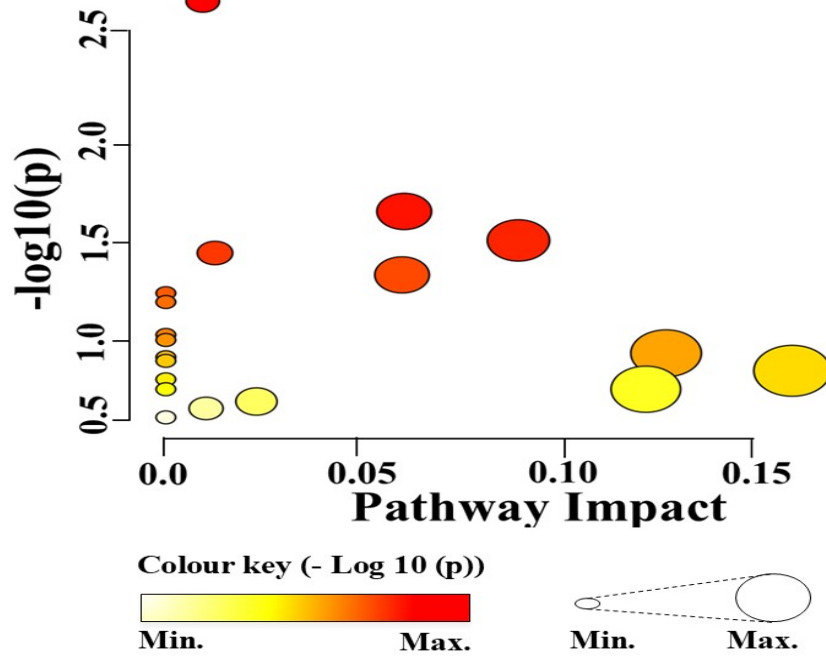

**Fig S4:** Pathway analysis of metabolites obtained from Lung cancer cells via NMR using Metaboanalyst 6.0

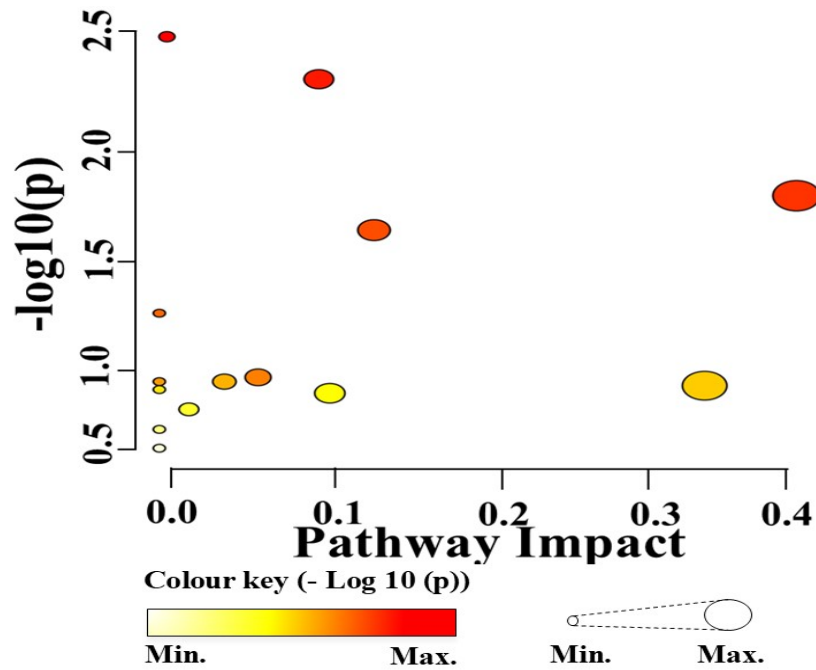

**Fig S5:** Pathway analysis of metabolites obtained from Glioma cancer cells via NMR using Metaboanalyst 6.0

**Tables:****S1: Pancreatic cancer**

| <b>Pathway Name</b>                         | <b>-Log<br/>10(p)</b> | <b>Impact</b> | <b>Hit/Total</b> | <b>-Log10 (FDR)</b> |
|---------------------------------------------|-----------------------|---------------|------------------|---------------------|
| Galactose metabolism                        | 4.2137                | 0.12027       | 4/27             | 0.0048907           |
| Glycerolipid metabolism                     | 2.086                 | 0.40498       | 2/16             | 0.20364             |
| Starch and Sucrose metabolism               | 1.9849                | 0.13486       | 2/18             | 0.20364             |
| Pentose and glucuronate interconversions    | 1.9388                | 0.16867       | 2/19             | 0.20364             |
| Fructose and Mannose Metabolism             | 1.8953                | 0.00311       | 2/20             | 0.20364             |
| Alanine, Aspartate and Glutamate metabolism | 1.6142                | 0.10817       | 2/28             | 0.32417             |
| Glycine, Serine and Threonine metabolism    | 1.48                  | 0.0           | 2/33             | 0.3784              |
| Arginine and Proline metabolism             | 1.4099                | 0.07093       | 2/36             | 0.3891              |
| Amino sugar and nucleotide sugar metabolism | 1.2875                | 0.06367       | 2/42             | 0.45854             |
| Thiamine metabolism                         | 1.2168                | 0.0           | 1/7              | 0.4856              |
| Taurine and hypotaurine metabolism          | 1.1606                | 0.0           | 1/8              | 0.50245             |
| Arginine biosynthesis                       | 0.92825               | 0.11675       | 1/14             | 0.78642             |
| Pantothenate and CoA Biosynthesis           | 0.78397               | 0.0           | 1/20             | 1.0                 |
| Pentose Phosphate pathway                   | 0.72856               | 0.16884       | 1/23             | 1.0                 |
| Glycolysis/Gluconeogenesis                  | 0.68058               | 0.0           | 1/26             | 1.0                 |
| Glutathione metabolism                      | 0.6519                | 0.00343       | 1/28             | 1.0                 |
| Cysteine and methionine metabolism          | 0.58927               | 0.09592       | 1/33             | 1.0                 |
| Primary Bile acid biosynthesis              | 0.4675                | 0.0           | 1/46             | 1.0                 |
| Purine metabolism                           | 0.32581               | 0.01406       | 1/10             | 1.0                 |

**Table S2: Lung Cancer**

| <b>Pathway Name</b>                         | <b>-Log<br/>10(p)</b> | <b>Impact</b> | <b>Hit/Tota<br/>l</b> | <b>-Log10 (FDR)</b> |
|---------------------------------------------|-----------------------|---------------|-----------------------|---------------------|
| Galactose metabolism                        | 2.7487                | 0.00905       | 3/27                  | 0.1427              |
| Purine metabolism                           | 1.5842                | 0.06425       | 3/70                  | 0.88521             |
| Glycine, Serine and Threonine metabolism    | 1.4236                | 0.09505       | 2/33                  | 0.88521             |
| Glycerophospholipid metabolism              | 1.354                 | 0.01324       | 2/36                  | 0.88521             |
| Amino sugar and Nucleotide Metabolism       | 1.2326                | 0.06367       | 2/42                  | 0.936555            |
| Valine, Leucine and Isoleucine biosynthesis | 1.1316                | 0.0           | 1/8                   | 0.9454              |
| Ascorbate and Aldarate metabolism           | 1.0824                | 0.0           | 1/9                   | 0.9454              |
| Arginine Biosynthesis                       | 0.12587               | 0.0           | 1/14                  | 1.0                 |
| Butanoate metabolism                        | 0.87201               | 0.0           | 1/15                  | 1.0                 |
| Starch and Sucrose metabolism               | 0.79854               | 0.13486       | 1/18                  | 1.0                 |
| Pentose and glucuronate interconversions    | 0.77696               | 0.0           | 1/19                  | 1.0                 |
| Fructose and Mannose metabolism             | 0.75658               | 0.0           | 1/20                  | 1.0                 |
| Pentose Phosphate pathway                   | 0.70156               | 0.16884       | 1/23                  | 1.0                 |
| Glycolysis/Gluconeogenesis                  | 0.65398               | 0.0           | 1/26                  | 1.0                 |

|                                            |         |         |      |     |
|--------------------------------------------|---------|---------|------|-----|
| Lysine degradation                         | 0.59935 | 0.0     | 1/30 | 1.0 |
| Inositol Phosphate metabolism              | 0.59935 | 0.1293  | 1/30 | 1.0 |
| Arginine and proline metabolism            | 0.53138 | 0.02442 | 1/36 | 1.0 |
| Valine, Leucine and isoleucine degradation | 0.49305 | 0.01064 | 1/40 | 1.0 |
| Primary Bile acid biosynthesis             | 0.4434  | 0.0     | 1/46 | 1.0 |

**Tabl1 S3: Glioma Cancer**

| <b>Pathway Name</b>                         | <b>-Log<br/>10(p)</b> | <b>Impact</b> | <b>Hit/Total</b> | <b>-Log10 (FDR)</b> |
|---------------------------------------------|-----------------------|---------------|------------------|---------------------|
| Pyrimidine metabolism                       | 2.4706                | 0.00555       | 3/39             | 0.21657             |
| Arginine biosynthesis                       | 2.2665                | 0.11675       | 2/14             | 0.21657             |
| Galactose metabolism                        | 1.7.65                | 0.46646       | 2/27             | 0.52415             |
| Cysteine and Methionine metabolism          | 1.5413                | 0.15717       | 2/33             | 0.57505             |
| Ascorbate and Aldarate metabolism           | 1.1423                | 0.0           | 1/9              | 1.0                 |
| Pentose and glucuronate interconversions    | 0.83422               | 0.07229       | 1/19             | 1.0                 |
| Fructose and Mannose metabolism             | 0.81358               | 0.0           | 1/20             | 1.0                 |
| Arginine Biosynthesis                       | 0.12587               | 0.0           | 1/14             | 1.0                 |
| Pantothenate and CoA Biosynthesis           | 0.81358               | 0.04762       | 1/20             | 1.0                 |
| Beta-Alanine metabolism                     | 0.79402               | 0.39925       | 1/21             | 1.0                 |
| Propanoate metabolism                       | 0.77544               | 0.0           | 1/22             | 1.0                 |
| Pentose Phosphate pathway                   | 0.75777               | 0.12481       | 1/23             | 1.0                 |
| Alanine, aspartate and glutamate metabolism | 0.68046               | 0.02163       | 1/28             | 1.0                 |
| Arginine and proline metabolism             | 0.58422               | 0.00          | 1/36             | 1.0                 |
| Primary Bile acid biosynthesis              | 0.49377               | 0.0           | 1/46             | 1.0                 |
